# Supplementary material
Source: MDPI journal article supplement (https://www.mdpi.com/2077-0472/14/5/761)
Supplement: s1 [file s1]

## Article

# Heat Stress and Irrigation Management Effects on the Fruit Color and Fruit Quality in ‘Hongro’ Apples

Van Giap Do<sup>†</sup>, Youngsuk Lee<sup>†</sup>, Juhyeon Park, Nay Myo Win, Soon-Il Kwon, Sangjin Yang, Seonae Kim\*

Apple Research Center, National Institute of Horticultural and Herbal Science, Rural Development Administration, Daegu, 43100, Republic of Korea

## Supplementary Table:

- Table S1. qRT-PCR primer list used for analysis the expression levels of anthocyanin biosynthesis genes
- Table S2. qRT-PCR primer list used for analysis the expression levels of carotenoid biosynthesis genes
- Table S3. The growth characteristics of apple tree grown under different orchard-based managements

## Supplementary Figure:

- Figure S1. Meteorological data collected at the experimental site of the Apple Research Center (Gunwi-gun, Daegu, South Korea) in 2022.
- Figure S2. Apparent differences in the coloration pattern of on-tree fruits among the three groups were subjected to different orchard-based management.
- Figure S3. Variant coloration patterns of ‘Hongro’ fruit at different treatments among three groups based on orchard management practices at harvest.
- Figure S4. The emergence of new shoots was observed in ‘Hongro’ apple trees grown inside the vinyl house during fruit maturing.

**Table S1.** qRT-PCR primer list used for analysis the expression levels of anthocyanin biosynthesis genes

| Gene            | Encoded protein                                       |   | Primer sequence (5'-3')   | GenBank ID     |
|-----------------|-------------------------------------------------------|---|---------------------------|----------------|
| <i>MdPAL</i>    | Phenylalanine<br>Ammonialyase                         | F | TTCCTTGGCAACCCTGTCAC      | AF494403       |
|                 |                                                       | R | ATGTCGACCGCCTCAAAGG       |                |
| <i>MdCHS</i>    | Chalcone Synthase                                     | F | GGACTGGAACTCACTCTTC       | AB074485.1     |
|                 |                                                       | R | GCCGTAATCTGACAACAC        |                |
| <i>MdCHI</i>    | Chalcone Isomerase                                    | F | AGGATCACTAACGATCAGCTTCTCT | XM_029100826.1 |
|                 |                                                       | R | TGGCCAAACTTTGCTTTGCTG     |                |
| <i>MdC4H</i>    | Cinnamate-<br>4-hydroxylase                           | F | ACTTGACACACCCACAGAGG      | DR998024.1     |
|                 |                                                       | R | ATACGGGTACGGGTATGGGA      |                |
| <i>Md4CL</i>    | 4-coumarate:<br>CoA ligase                            | F | TTCTGTGACCTGTGCCTCTC      | MG334585.1     |
|                 |                                                       | R | GAGAATGGAATCGTTTCTGCCT    |                |
| <i>MdF3H</i>    | Flavanone<br>3-hydroxylase                            | F | CCAAGCAGTGGTGAAGTC        | AB074486       |
|                 |                                                       | R | CTTCTCTCCCTCCCTCAC        |                |
| <i>MdDFR</i>    | Dihydro<br>Xavonol 4-reductase                        | F | AAGCCTCATCACTGGACT        | AF117268       |
|                 |                                                       | R | ATGTGAGAAAGGCAGAGG        |                |
| <i>MdANS</i>    | Anthocyanin<br>Synthase                               | F | GCTGGAGAAAGAAGTTGG        | AB074487       |
|                 |                                                       | R | GGAGGATGAAGGTGAGTG        |                |
| <i>MdUFGluT</i> | UDP-glucose:<br>flavonoid-3-O-<br>glucosyltransferase | F | CAACATCCAAGGTCTCTC        | AF117267       |
|                 |                                                       | R | GTCCCATCTGAAGTAGCA        |                |
| <i>MdMYB10</i>  | R3R3 myb-type<br>Transcript Factor                    | F | TCATCTCTCTACTGCAGTGCCTA   | XM_029107483.1 |
|                 |                                                       | R | CCAGAAAGACACCTTAGACCTTCG  |                |

**Table S2.** qRT-PCR primer list used for analysis the expression levels of carotenoid biosynthesis genes

| Gene                              | Encoded protein                          |   | Primer sequence (5'-3')   | GenBank ID     |
|-----------------------------------|------------------------------------------|---|---------------------------|----------------|
| <i>MdGGPPS</i>                    | Geranylgeranyl<br>Pyrophosphate Synthase | F | CCGTGACCCGATTACGATCC      | XM_008356445.3 |
|                                   |                                          | R | ATGGATTCCGACCCACCAAC      |                |
| <i>MdPSY</i>                      | Phytoene<br>Synthase                     | F | GGGGATATGCCCAGAATCAAGC    | NM_001294092.1 |
|                                   |                                          | R | CTCTTCTCTCTCTAGCATCTTCTCC |                |
| <i>MdPDS</i>                      | Phytoene<br>Desaturase                   | F | ACATTCCGGTTTCTGACCCG      | XM_008356843.3 |
|                                   |                                          | R | ACCAAAGCCTTATCGGGTGG      |                |
| <i>MdZISO</i>                     | Zeta-carotene<br>Isomerase               | F | AGCCCTGAGGTTGTGATGTTG     | XM_008339306.3 |
|                                   |                                          | R | GTCCCCGCAAACAAAACACG      |                |
| <i>MdZDS</i>                      | Zeta-carotene<br>Desaturase              | F | TTTGCCACTAAGACCGAGGC      | XM_029100719.1 |
|                                   |                                          | R | CTGAGATGAAACCTGCCCCC      |                |
| <i>MdCRTISO</i>                   | Carotenoid<br>Prolycopene Isomerase      | F | CCAAAGACACACAGGCGGTA      | NM_001329029.1 |
|                                   |                                          | R | AGACCATCTATGGCGGTGGT      |                |
| <i>MdLCY<math>\epsilon</math></i> | Epsilon Lycopene<br>Cyclase              | F | CTGGCCGCAAGAAAGGAAAC      | XM_008389970.3 |
|                                   |                                          | R | CCACATCCAGGTGGGTAAGC      |                |
| <i>MdLCY<math>\beta</math></i>    | Beta Lycopene<br>Cyclase                 | F | ACCCACATGAGCTTGTCGTC      | XM_008394165.3 |
|                                   |                                          | R | GACACAACAAGTTCCGAAGAGC    |                |
| <i>MdCRH<math>\beta</math></i>    | Beta-carotene<br>Hydroxylase 2           | F | CGGTGTTTGGGATGGCGTAT      | XM_029106190.1 |
|                                   |                                          | R | CTTCGAGTTCTGATGAGCCG      |                |
| <i>MdZEP</i>                      | Zeaxanthin<br>Epoxidase                  | F | AGGGCCTTCCCCTCACTATC      | XM_029099177.1 |
|                                   |                                          | R | GCTGTAACCTTGCTTGGGTCT     |                |

**Table S3.** The growth characteristics of apple tree grown under different orchard-based managements

| Treatment   | Tree No | Tree height<br>(cm) | Stem diameter<br>(cm) | Total new shoot<br>growth length (cm) | The primary shoot<br>growth length (cm) | Number of<br>Fruits/Trre |
|-------------|---------|---------------------|-----------------------|---------------------------------------|-----------------------------------------|--------------------------|
| Water spray | 1       | 200.5               | 76.7                  | 19.0                                  | 11.3                                    | 105                      |
|             | 2       | 177.0               | 39.1                  | 17.4                                  | 9.0                                     | 58                       |
|             | 3       | 118.5               | 49.7                  | 11.3                                  | 0.0                                     | 40                       |
|             | 4       | 204.0               | 42.6                  | 17.6                                  | 0.0                                     | 68                       |
|             | 5       | 209.0               | 87.9                  | 9.2                                   | 0.0                                     | 60                       |
| Average     |         | 181.8 ± 37.5        | 59.2 ± 21.8           | 14.9 ± 4.4                            | 4.1 ± 5.6                               | 66.2 ± 24.0              |
| Vinyl house | 1       | 183.0               | 42.3                  | 10.3                                  | 5.6                                     | 66                       |
|             | 2       | 196.5               | 76.1                  | 9.4                                   | 7.3                                     | 117                      |
|             | 3       | 201.0               | 84.6                  | 16.8                                  | 19.0                                    | 133                      |
|             | 4       | 200.5               | 84.0                  | 10.7                                  | 12.5                                    | 95                       |
|             | 5       | 244.0               | 91.6                  | 19.6                                  | 15.9                                    | 136                      |
| Average     |         | 205.0 ± 23.0        | 75.7 ± 19.5           | 13.4 ± 4.5                            | 12.1 ± 5.6                              | 109.4 ± 29.2             |
| Control     | 1       | 136.5               | 36.7                  | 12.0                                  | 6.0                                     | 71                       |
|             | 2       | 156.5               | 36.7                  | 17.1                                  | 10.8                                    | 66                       |
|             | 3       | 149.5               | 45.2                  | 15.5                                  | 3.0                                     | 120                      |
|             | 4       | 209.0               | 61.3                  | 14.6                                  | 10.4                                    | 97                       |
|             | 5       | 195.0               | 58.7                  | 18.7                                  | 10.5                                    | 65                       |
| Average     |         | 169.3 ± 31.1        | 47.7 ± 11.8           | 15.6 ± 2.5                            | 8.1 ± 3.5                               | 83.8 ± 24.1              |

All values are shown as mean ± SD of data measured from the 5 individual trees of each group.

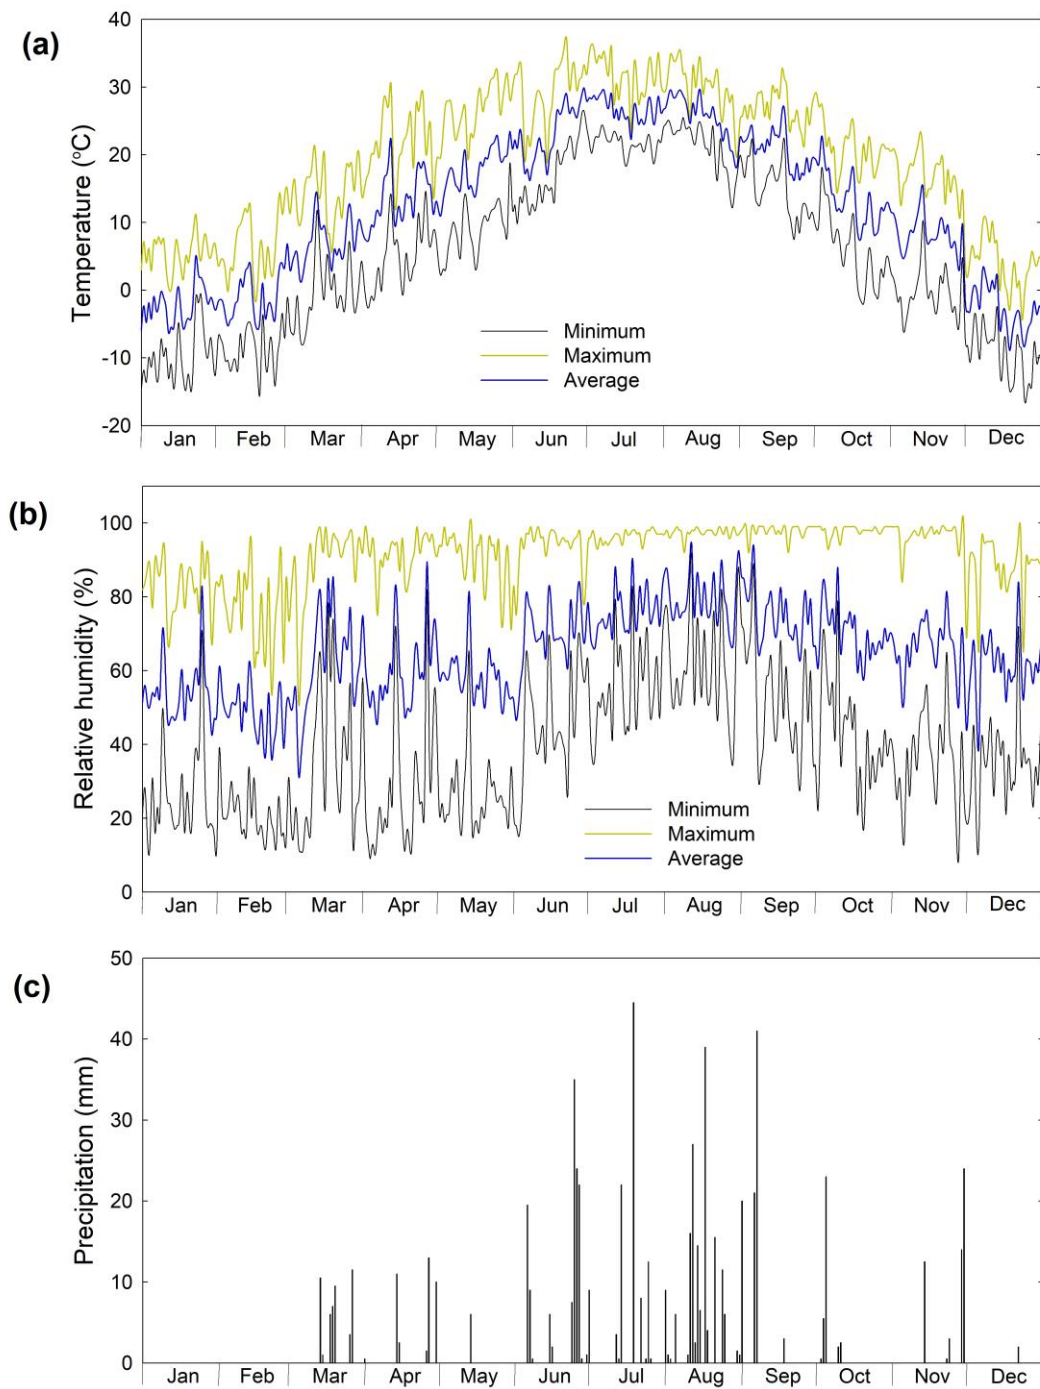

**Figure S1.** Meteorological data collected at the experimental site of the Apple Research Center (Gunwi-gun, Daegu, South Korea) in 2022. Meteorological data were downloaded from the Korean Meteorological Administration (<http://www.kma.go.kr>). Data included daily mean, minimum, and maximum temperatures (a), relative humidity (rainfall) (b), and precipitation (c).

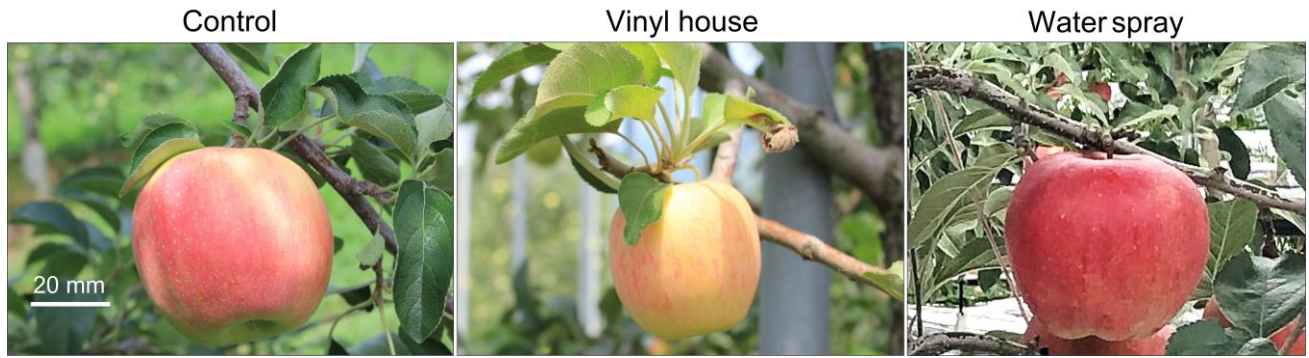

**Figure S2.** Apparent differences in the coloration pattern of on-tree fruits among the three groups were subjected to different orchard-based management. Picture representative for fruit of each groups were captured at ripening stage (1 week before harvesting). Scale bars = 20 mm.

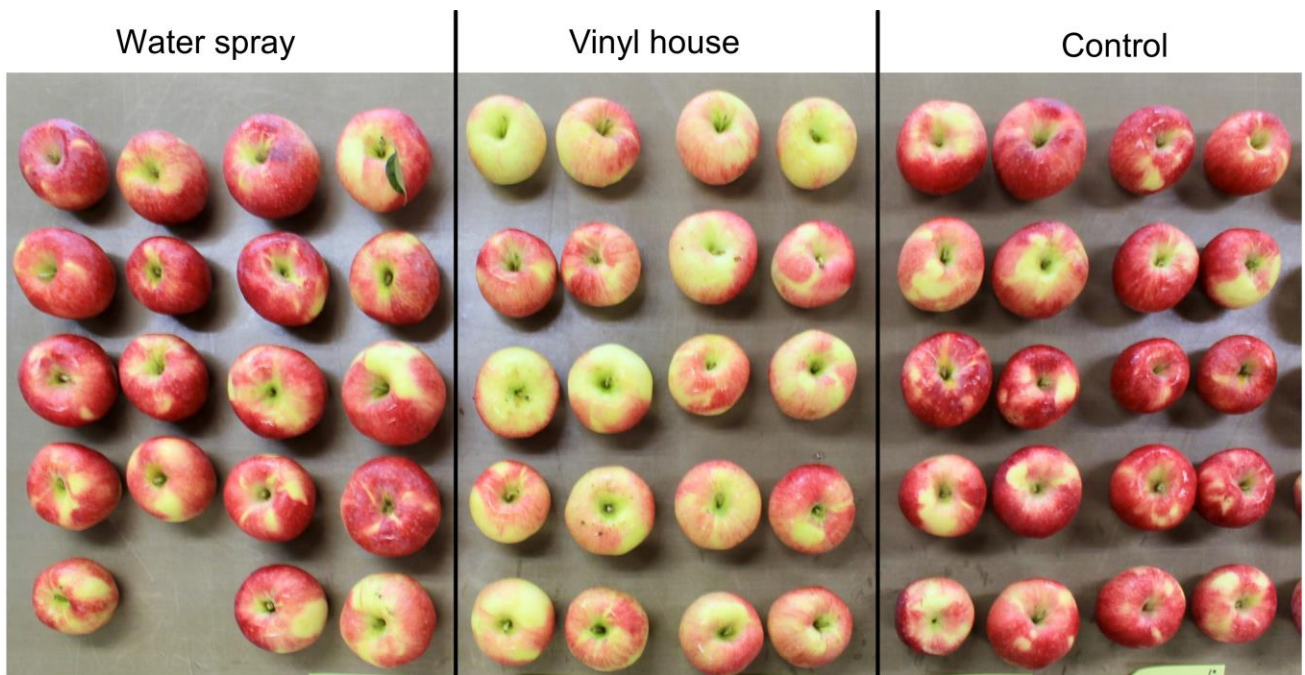

**Figure S3.** Variant coloration patterns of 'Hongro' fruit at different treatments among three groups based on orchard management practices at harvest.



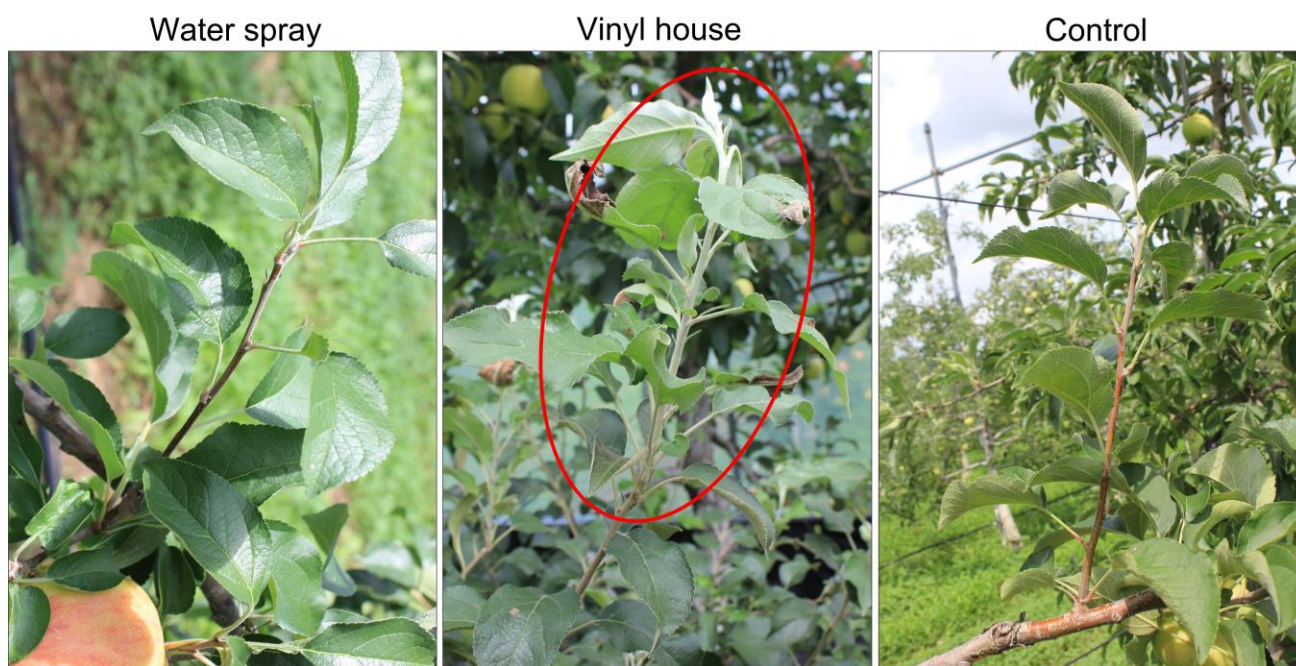

**Figure S4.** The emergence of new shoots was observed in 'Hongro' apple trees grown inside the vinyl house during fruit maturing.
